# Supplementary material for: Germline mosaicism in a family with MBD5 haploinsufficiency
Source: PubMed Central journal article supplement — Cold Spring Harb Mol Case Stud. 2022 Dec;8(7):a006253. doi: 10.1101/mcs.a006253 (PMC9808559; doi:10.1101/mcs.a006253), 2022-12
Supplement: supp_mcs.a006253_Supplemental_Material.pdf [file supp_mcs.a006253_Supplemental_Material.pdf]

Supplementary Material

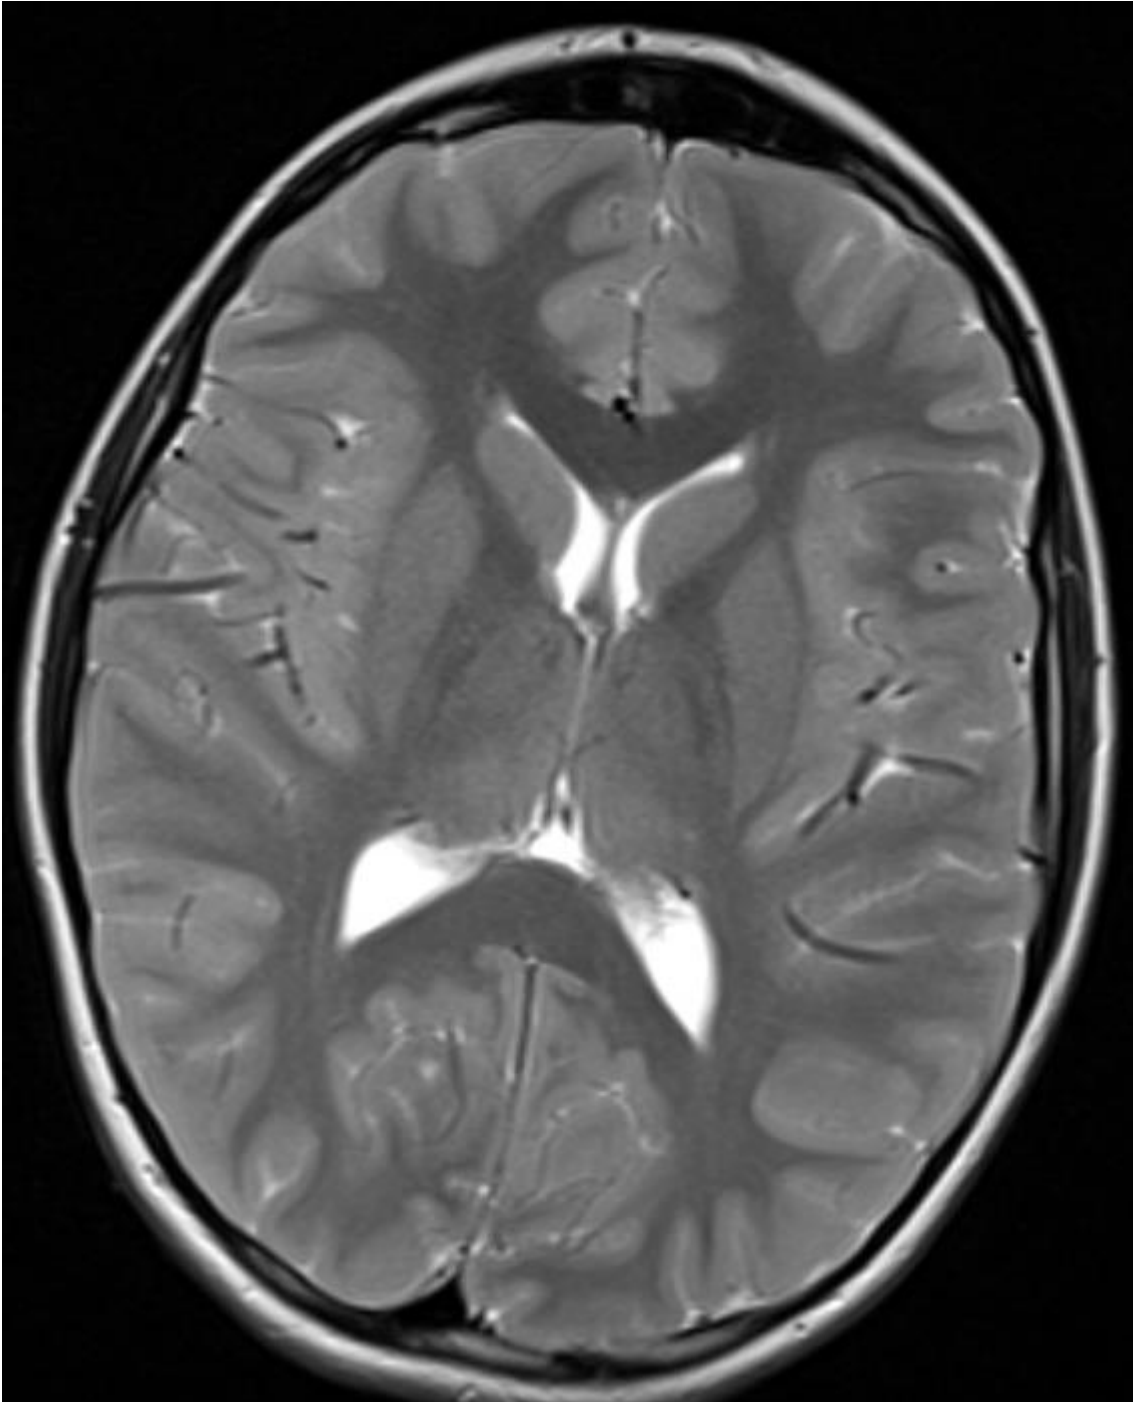

**Supplementary Image 1:** Axial T2-weighted image from MRI study (Patient 3). This was reported as normal.

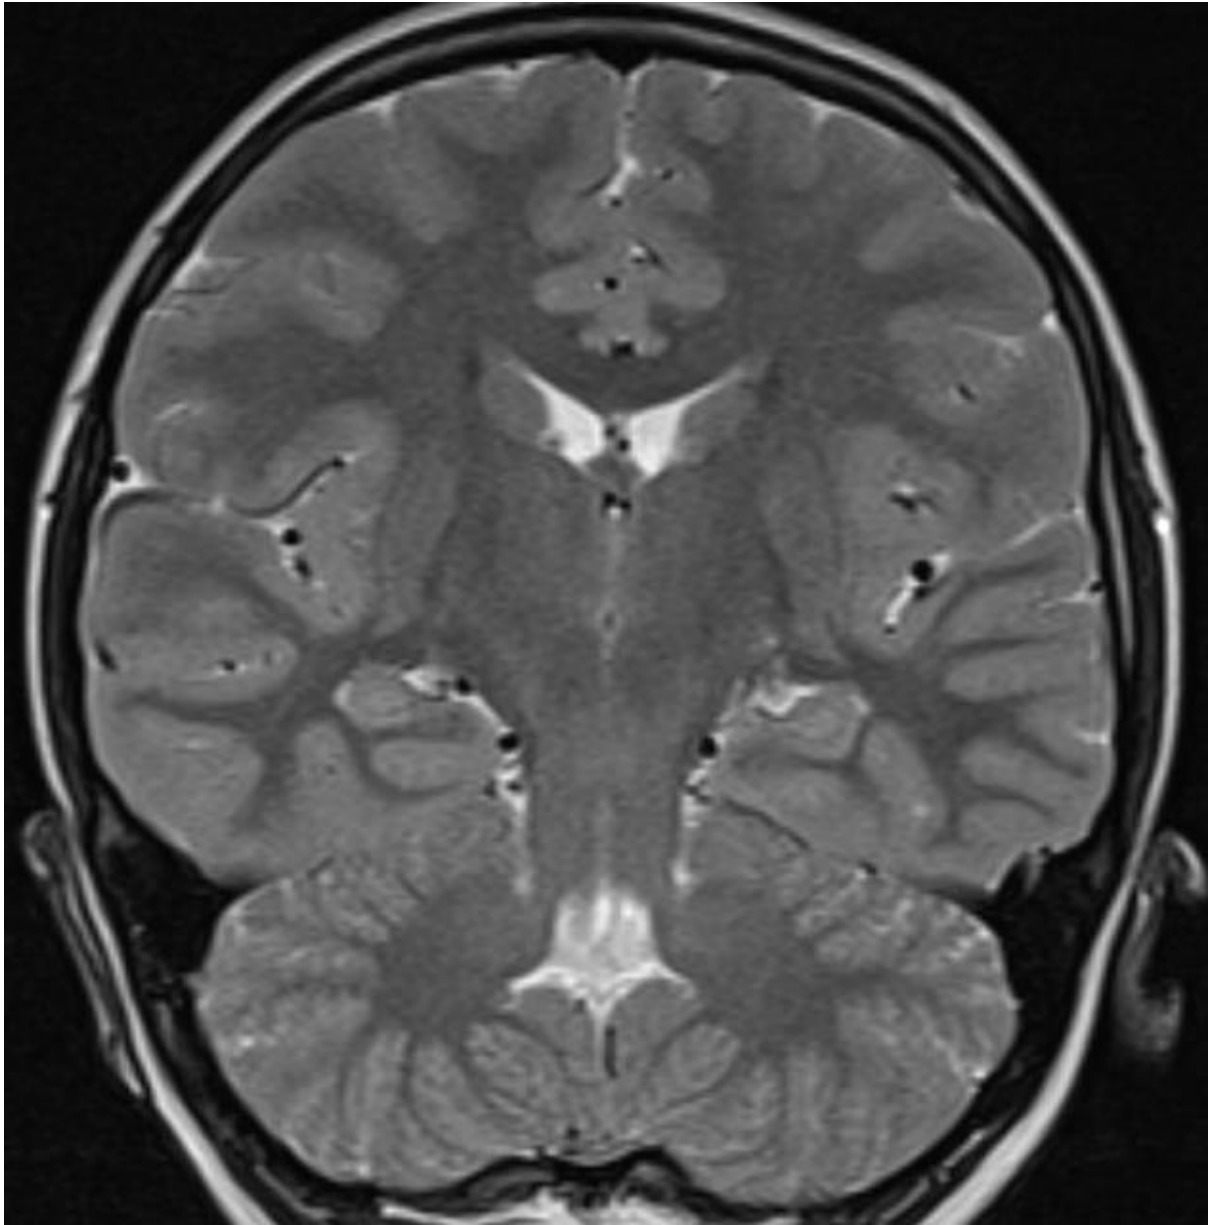

**Supplementary Image 2:** Coronal T2-weighted image from MRI study (Patient 3). This was reported as normal.
